# Supplementary material
Source: PubMed Central journal article supplement (PMC2393757)

**A**

OTcH-1      CS-73

bp

2000  
1500  
1000  
750  
500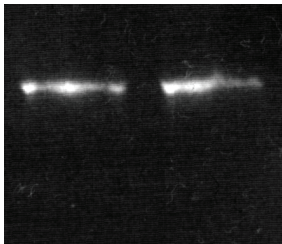**B***Taq 1**Dpn II*

OTcH-1      CS-73      OTcH-1      CS-73

bp  
1000  
900  
800  
700  
600  
500  
400  
300  
200  
100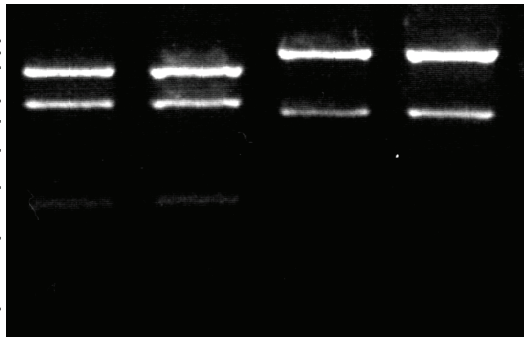

Supplement: pnas_0708554105_1.pdf [file pnas_0708554105_1.pdf]

### A. After 3 h incubation in darkness

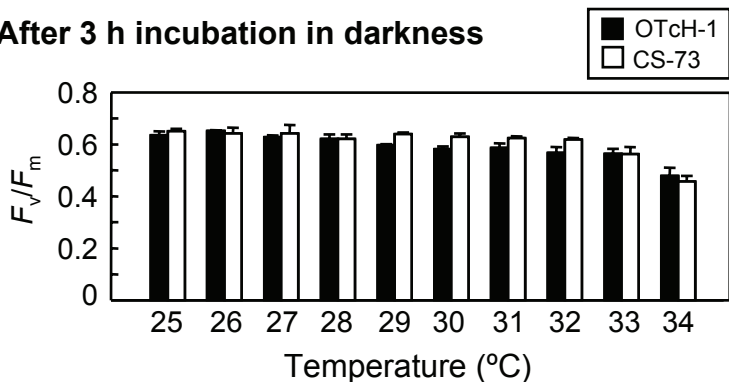

### B. After 3 h incubation in light

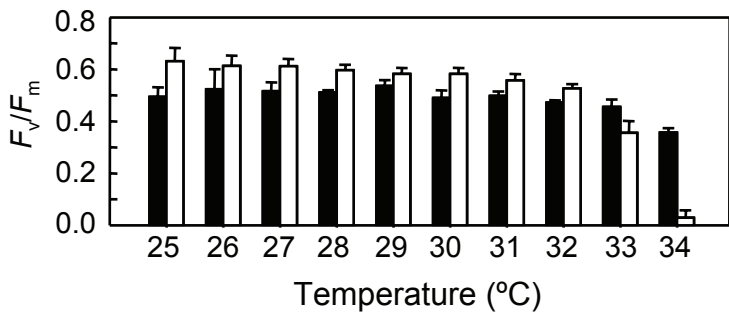

Supplement: pnas_0708554105_2.pdf [file pnas_0708554105_2.pdf]

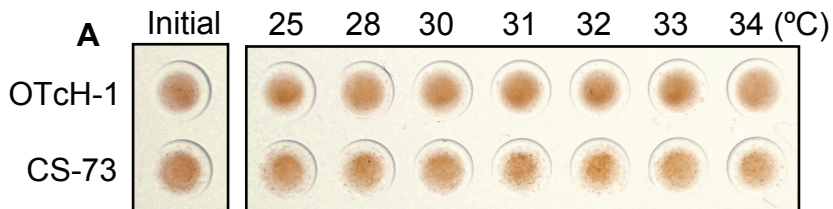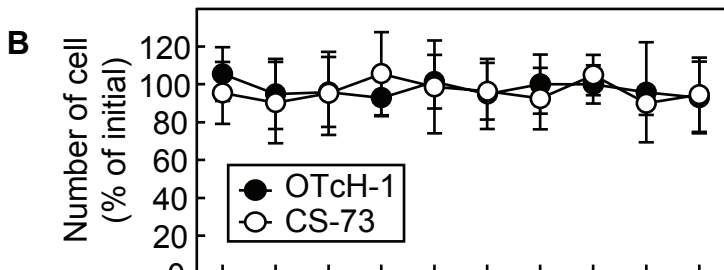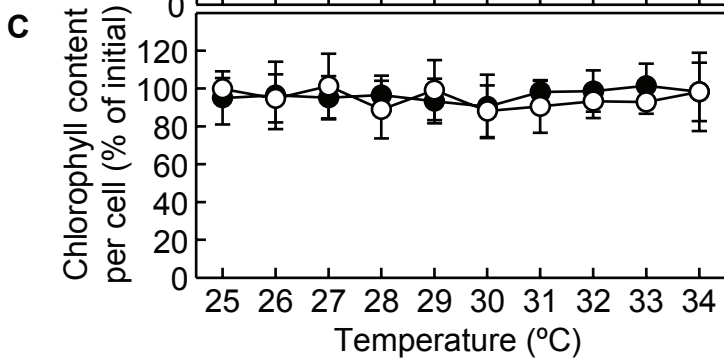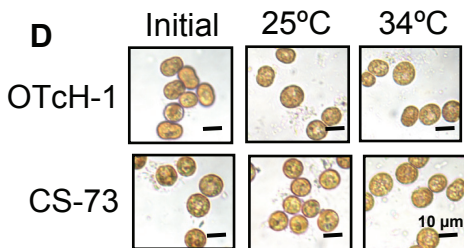

Supplement: pnas_0708554105_3.pdf [file pnas_0708554105_3.pdf]

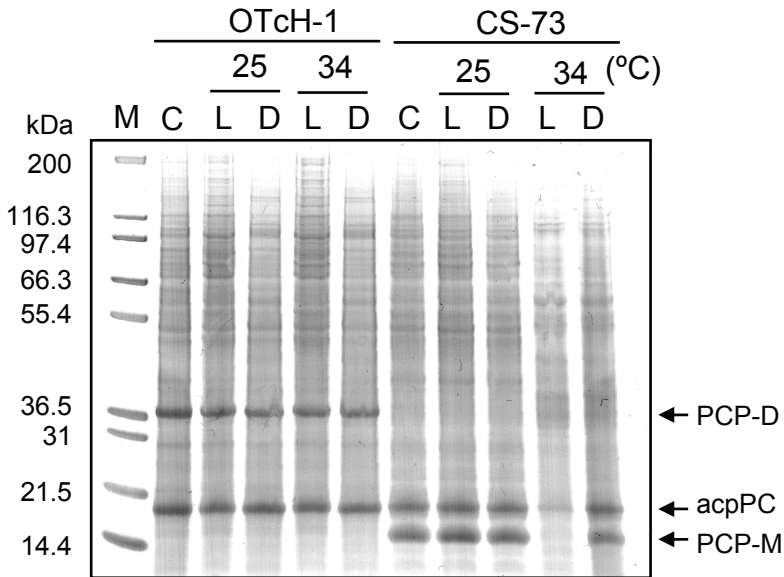

Supplement: pnas_0708554105_4.pdf [file pnas_0708554105_4.pdf]

## A. Photoinhibition

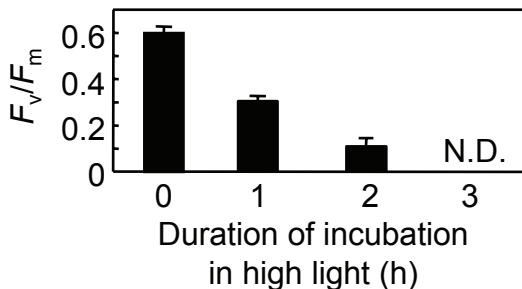

## B. Immunoblotting against D1 protein

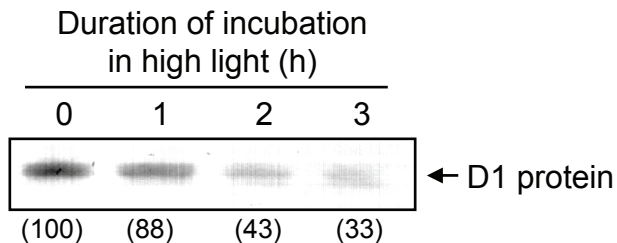

## C. $^{35}\text{S}$ uptake into acpPC

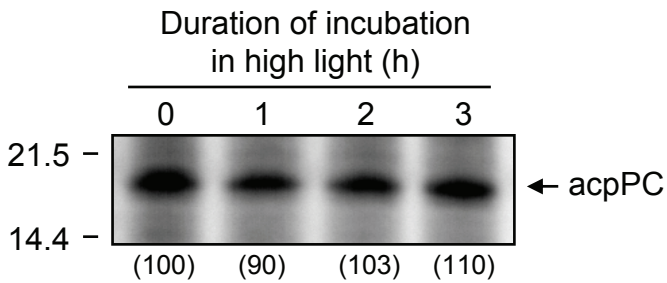

Supplement: pnas_0708554105_5.pdf [file pnas_0708554105_5.pdf]

## A. Chlorophyll content

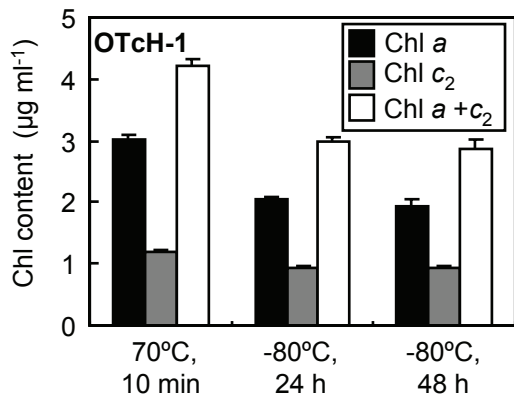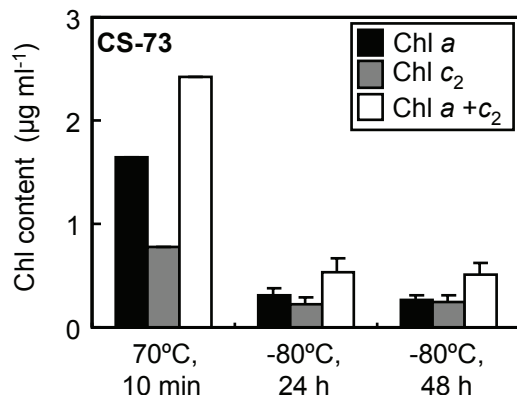

## B. Absorption spectrum

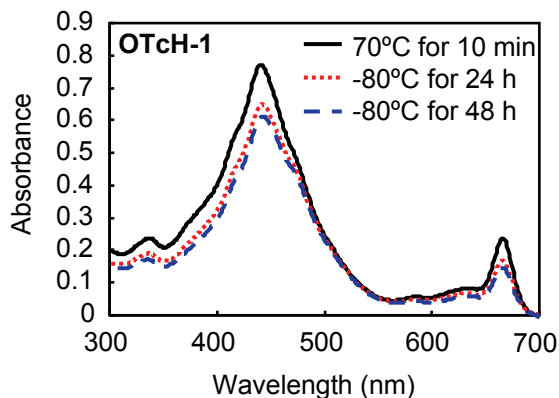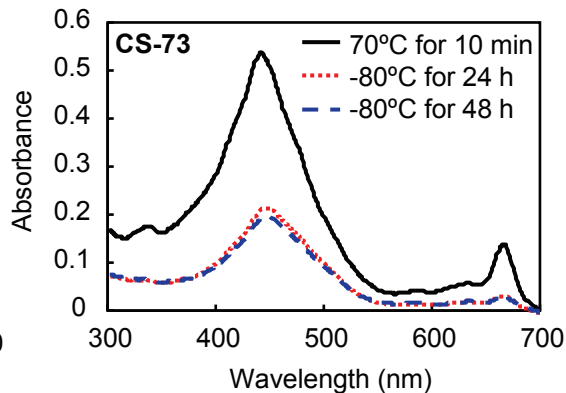

Supplement: pnas_0708554105_6.pdf [file pnas_0708554105_6.pdf]
